# Supplementary material for: TLR Stimulation Dynamically Regulates Heme and Iron Export Gene Expression in Macrophages
Source: Hindawi journal article supplement (doi:10.1155/2016/4039038), 2016-01-01
Supplement: f1 [file 4039038.f1.pdf]

# Supplemental Figure 1

Factors predicted within a dissimilarity margin less or equal than 15 % :

|    |                 |    |                               |    |                  |    |                          |    |                     |    |                   |    |                     |    |                   |
|----|-----------------|----|-------------------------------|----|------------------|----|--------------------------|----|---------------------|----|-------------------|----|---------------------|----|-------------------|
| 8  | TFE-1 [T00824]  | 1  | STAT4 [T01577]                | 3  | c-Ets-1 [T00112] | 3  | GR-beta [T01920]         | 4  | ATF3 [T01313]       | 5  | GR-alpha [T00337] | 6  | C/EBPbeta [T00581]  | 7  | HNF-1C [T01851]   |
| 9  | HNF-1B [T01950] | 9  | NFI/CTF [T00094]              | 10 | FOXP3 [T04280]   | 11 | c-Myb [T00137]           | 12 | Elk-1 [T00250]      | 13 | GCF [T00320]      | 14 | RNR-alpha [T01345]  | 15 | RAR-beta [T00721] |
| 16 | NF-1 [T00539]   | 17 | NF-AT2 [T01945]               | 18 | NF-AT1 [T01948]  | 19 | STAT1beta [T01573]       | 20 | ER-B [T00686]       | 21 | ER-A [T01661]     | 22 | E2F-1 [T01542]      | 23 | ETF [T00270]      |
| 24 | Pax-5 [T00070]  | 25 | p53 [T00671]                  | 26 | Sp1 [T00739]     | 27 | Egr-3 [T00243]           | 28 | YY1 [T00915]        | 29 | XBP-1 [T00902]    | 30 | PEA3 [T00685]       | 31 | c-Ets-2 [T00113]  |
| 32 | IRF-1 [T00423]  | 33 | HNF-3alpha [T02512]           | 34 | NF-AT1 [T00150]  | 35 | c-Jun [T00133]           | 36 | MAZ [T00490]        | 37 | WT1 [T00889]      | 38 | NF-kappaB1 [T00592] | 39 | ENKTF-1 [T00255]  |
| 40 | SRY [T00997]    | 41 | TCF-4E [T02878]               | 42 | GR [T05076]      | 43 | AP-2alphaA [T00035]      | 44 | C/EBPalpha [T00105] | 45 | CTF [T00174]      | 46 | NF-Y [T00150]       | 47 | AP-1 [T00029]     |
| 48 | Ahr [T01795]    | 49 | PPAR-alpha/RXR-alpha [T05221] | 50 | YDR [T00885]     | 51 | PXR-1/RXR-alpha [T05671] | 52 | T3R-beta1 [T00851]  | 53 | AR [T00040]       | 54 | LEF-1 [T02905]      | 55 | USF2 [T00878]     |
| 56 | TFHD [T00820]   | 57 | EBF [T05427]                  | 58 | c-Fos [T00123]   |    |                          |    |                     |    |                   |    |                     |    |                   |

Zoom    [Data \(txt\)](#)

|                                                 |   |         |    |    |       |         |       |    |          |    |          |       |          |          |          |          |          |          |          |          |          |          |          |          |          |          |          |          |          |          |          |          |          |          |          |          |          |        |
|-------------------------------------------------|---|---------|----|----|-------|---------|-------|----|----------|----|----------|-------|----------|----------|----------|----------|----------|----------|----------|----------|----------|----------|----------|----------|----------|----------|----------|----------|----------|----------|----------|----------|----------|----------|----------|----------|----------|--------|
|                                                 | 1 | 10      | 20 | 30 | 40    | 50      | 60    | 70 | 80       | 90 | 100      | 110   | 120      | 130      | 140      | 150      | 160      | 170      | 180      | 190      | 200      |          |          |          |          |          |          |          |          |          |          |          |          |          |          |          |          |        |
| FP002142 FLVCR1_1 :+U EU:NC; range -499 to 100. |   | 0 1 2 3 | 4  | 5  | 6 7 8 | 9 10 11 | 12 13 | 14 | 15 16 17 | 18 | 19 20 21 | 22 23 | 24 25 26 | 27 28 29 | 30 31 32 | 33 34 35 | 36 37 38 | 39 40 41 | 42 43 44 | 45 46 47 | 48 49 50 | 51 52 53 | 54 55 56 | 57 58 59 | 60 61 62 | 63 64 65 | 66 67 68 | 69 70 71 | 72 73 74 | 75 76 77 | 78 79 80 | 81 82 83 | 84 85 86 | 87 88 89 | 90 91 92 | 93 94 95 | 96 97 98 | 99 100 |

|  |                                                                                                                                                                                                                                                                                                       |     |     |     |     |     |     |     |     |     |     |     |     |     |     |     |     |     |     |     |
|--|-------------------------------------------------------------------------------------------------------------------------------------------------------------------------------------------------------------------------------------------------------------------------------------------------------|-----|-----|-----|-----|-----|-----|-----|-----|-----|-----|-----|-----|-----|-----|-----|-----|-----|-----|-----|
|  | 210                                                                                                                                                                                                                                                                                                   | 220 | 230 | 240 | 250 | 260 | 270 | 280 | 290 | 300 | 310 | 320 | 330 | 340 | 350 | 360 | 370 | 380 | 390 | 400 |
|  | 0 1 2 3 4 5 6 7 8 9 10 11 12 13 14 15 16 17 18 19 20 21 22 23 24 25 26 27 28 29 30 31 32 33 34 35 36 37 38 39 40 41 42 43 44 45 46 47 48 49 50 51 52 53 54 55 56 57 58 59 60 61 62 63 64 65 66 67 68 69 70 71 72 73 74 75 76 77 78 79 80 81 82 83 84 85 86 87 88 89 90 91 92 93 94 95 96 97 98 99 100 |     |     |     |     |     |     |     |     |     |     |     |     |     |     |     |     |     |     |     |

|  |                                                                                                                                                                                                                                                                                                       |     |     |     |     |     |     |     |     |     |     |     |     |     |     |     |     |     |     |     |     |
|--|-------------------------------------------------------------------------------------------------------------------------------------------------------------------------------------------------------------------------------------------------------------------------------------------------------|-----|-----|-----|-----|-----|-----|-----|-----|-----|-----|-----|-----|-----|-----|-----|-----|-----|-----|-----|-----|
|  | 410                                                                                                                                                                                                                                                                                                   | 420 | 430 | 440 | 450 | 460 | 470 | 480 | 490 | 500 | 510 | 520 | 530 | 540 | 550 | 560 | 570 | 580 | 590 | 600 | 610 |
|  | 0 1 2 3 4 5 6 7 8 9 10 11 12 13 14 15 16 17 18 19 20 21 22 23 24 25 26 27 28 29 30 31 32 33 34 35 36 37 38 39 40 41 42 43 44 45 46 47 48 49 50 51 52 53 54 55 56 57 58 59 60 61 62 63 64 65 66 67 68 69 70 71 72 73 74 75 76 77 78 79 80 81 82 83 84 85 86 87 88 89 90 91 92 93 94 95 96 97 98 99 100 |     |     |     |     |     |     |     |     |     |     |     |     |     |     |     |     |     |     |     |     |

Supplemental FIG 1 The EPDnew (1) eukaryotic promoter database was used to identify the *Flvcr* promoter sequence from -499 to +100 base pairs relative to the transcription start site. This sequence was queried for human transcription factor (TF) binding sites using PROMO (2) and the resulting output is shown above. Of the TF binding sites identified, many are known to be expressed in macrophages and activated by LPS signaling.
